# Supplementary material for: Designing a hybrid nanomaterial based on Cr-containing polyoxometalate and graphene oxide as an electrocatalyst for the hydrogen evolution reaction
Source: Royal Society of Chemistry journal article supplement (doi:10.1039/d4dt00320a), 2024-01-01
Supplement: d4dt00320a1.pdf [file d4dt00320a1.pdf]

## Supporting Information

### **Designing a hybrid nanomaterial based on Cr-containing polyoxometalate and graphene oxide as an electrocatalyst for the hydrogen evolution reaction**

Maryam Khalaji-Verjani, Majid Masteri-Farahani\*

Faculty of Chemistry, Kharazmi University, 15719-14911 Tehran, Iran

#### **Materials**

---

\* Corresponding author. Tel.: 00982634551023; E-mail address: mfarahani@khu.ac.ir.

Sodium molybdate dihydrate ( $\text{Na}_2\text{MoO}_4 \cdot 2\text{H}_2\text{O}$ ), disodium hydrogen phosphate ( $\text{Na}_2\text{HPO}_4$ ), nitric acid ( $\text{HNO}_3$ ), 3-aminopropyltrimethoxysilane (APTS),  $\text{H}_3\text{PMo}_{12}\text{O}_{40}$ ,  $\text{Cr}(\text{acac})_3$  complex, toluene, and methanol were purchased from Merck. The graphite powder was purchased from Sinchem Company. Nafion solution (5 wt%) was purchased from electrochemiabaspar-Iran.

## **Equipment**

Chemical analyses of samples were carried out with VARIAN VISTA-MPX ICP-OES spectrometer. CHN analysis was conducted with using Thermo Finnigan (Flash 1112 series EA) CHN analyzer. X-ray diffraction (XRD) patterns were collected using a X'Pert Pro instrument with  $\text{Cu K}\alpha$  radiation. Field emission Scanning Electron Microscope (FE-SEM) imaging and energy dispersive X-ray (EDX) spectroscopy were carried out on a TESCAN MIRA III instrument for micro-elemental analysis and mapping. Fourier transform infrared spectroscopy (FT-IR) spectra were measured through a Perkin-Elmer Spectrum RXI spectrometer using the standard KBr pellet method. Transmission electron microscopy (TEM) images were taken on a Zeiss-EM10C instrument with an accelerating voltage of 100 kV. Samples were prepared for TEM analysis by placing a few droplets of a suspension of the specimen in ethanol on a polymer microgrid supported on a Cu grid. The X-ray photoelectron spectroscopy (XPS) measurements were carried out on a Kratos AXIS Ultra HSA spectrometer equipped with a monochromatized  $\text{Al K}\alpha$  X-ray source (1468.71 eV). Specific surface area of each sample was analyzed with Brunauer-Emmett-Teller (BET)  $\text{N}_2$  method using a surface area analyzer (BEISORP Mini/Microtrac BEL Corp, Japan).  $^{31}\text{P}$  NMR spectra of the products were recorded on Bruker Avance 300.

## **Preparation of $\text{PMo}_{11}\text{-Cr-GO}$**

A solution of  $\text{PMo}_{11}\text{-Cr}$  (200 mg) in deionized water (10 mL) was added to a mixture of GO (500 mg) in deionized water (10 mL). After stirring for 3 h, the solid was collected via centrifugation, rinsed with cold water, and dried to obtain  $\text{PMo}_{11}\text{-Cr-GO}$ .

### **Preparation of $\text{PMo}_{12}\text{-mGO}$ , $\text{PMo}_{11}\text{-mGO}$ , and $\text{Cr-mGO}$**

First, 200 mg of mGO was dispersed in deionized water (10 mL). Next, a mixture of 200 mg of precursor ( $\text{PMo}_{12}$ ,  $\text{PMo}_{11}$ , or  $\text{Cr}(\text{acac})_3$ ) in 10 mL of deionized water was added to the mixture. After stirring for 3 h, the solid was collected via centrifugation, rinsed with cold water, and dried to obtain  $\text{PMo}_{12}\text{-mGO}$ ,  $\text{PMo}_{11}\text{-mGO}$ , and  $\text{Cr-mGO}$ , respectively.

### **Testing conditions for electrochemical analysis**

Electrochemistry measurements of the samples were carried out on a PalmSens electrochemical workstation with a three-electrode setup: Ag/AgCl as the reference electrode, glassy carbon electrode as the working electrode, and graphite rod as the counter electrode. HER polarization curves were collected at a scan rate of  $5 \text{ mV}\cdot\text{s}^{-1}$  via LSV in  $\text{H}_2\text{SO}_4$  0.5 M. The working electrodes were scanned for several times until the signals were stabilized and then the data for polarization curves were collected.

### **$^{31}\text{P}$ NMR spectra**

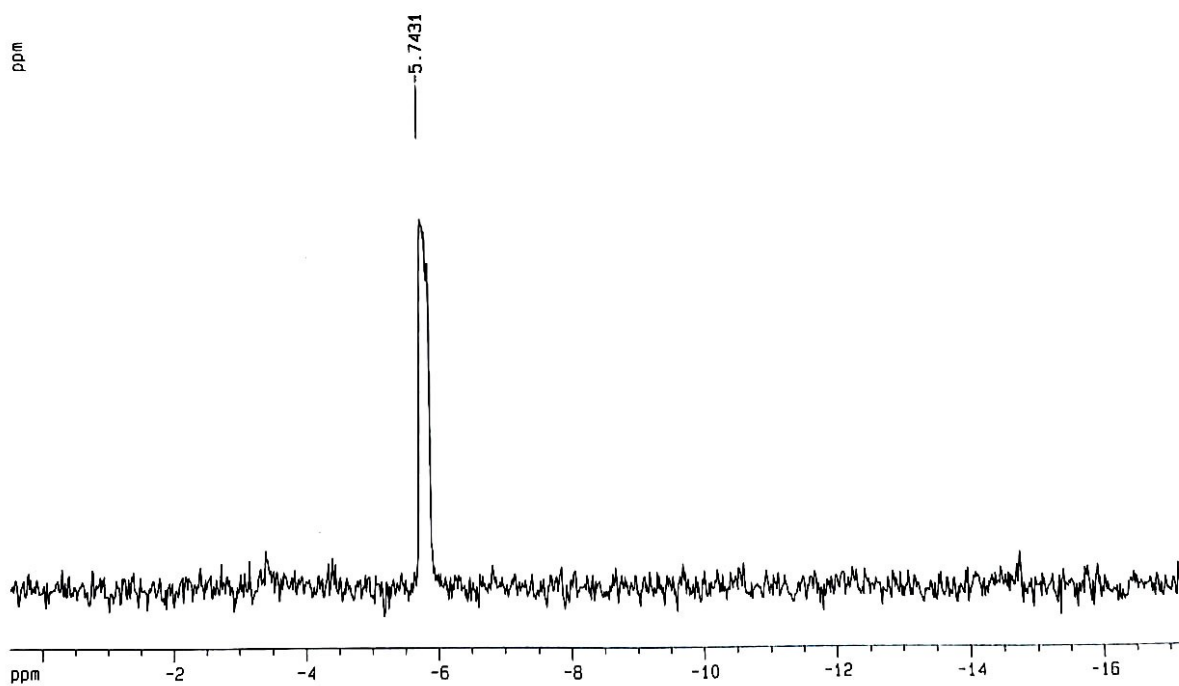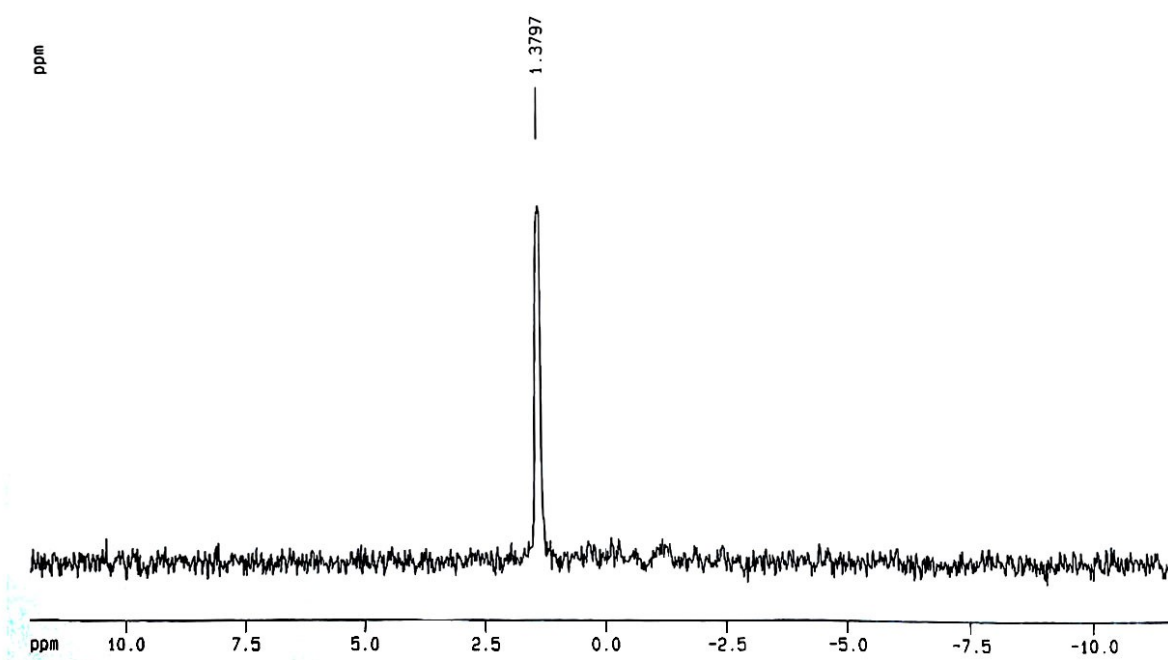

**Fig. S1.**  $^{31}\text{P}$  NMR spectra of  $\text{PMo}_{12}$  (top) and  $\text{PMo}_{11}$  (bottom).

## Elemental analysis

**Table S1.** The results of elemental analysis of P<sub>2</sub>Mo<sub>11</sub>-Cr.

| No. | Element | Percent (Calculated) | Mole (%) |
|-----|---------|----------------------|----------|
| 1   | C       | 5.35 (5.31)          | 0.445    |
| 2   | P       | 1.27 (1.37)          | 0.041    |
| 3   | Mo      | 45.01 (46.71)        | 0.469    |
| 4   | Cr      | 2.39 (2.30)          | 0.046    |
| 5   | Na      | 5.76 (6.10)          | 0.250    |

### Thermogravimetric analysis

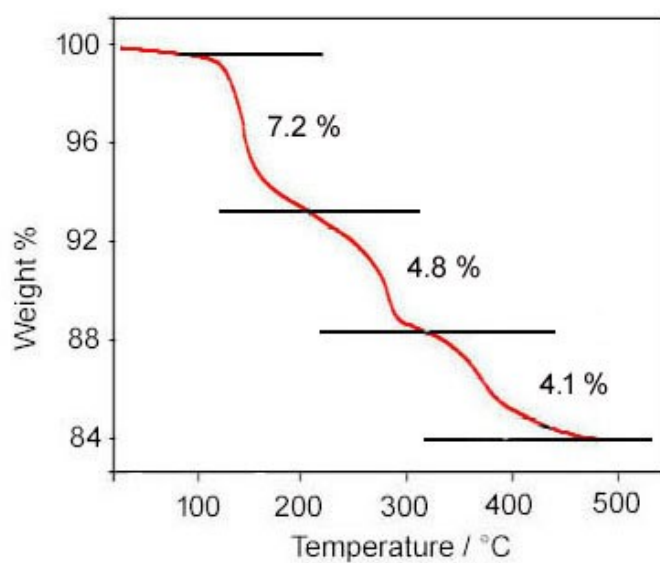

**Fig. S2.** TGA curve of P<sub>2</sub>Mo<sub>11</sub>-Cr.

### Cyclic voltammetry and electrochemical analyses

The cyclic voltammetry (CV) analyses of  $\text{PMo}_{11}\text{-Cr-mGO}$ ,  $\text{PMo}_{11}\text{-Cr}$ ,  $\text{PMo}_{11}$ ,  $\text{Cr}(\text{acac})_3$ , and GO modified GCE conducted in the 0.5 M  $\text{H}_2\text{SO}_4$  solution indicate the electrocatalytic HER activity of  $\text{PMo}_{11}\text{-Cr-mGO}$  as a heterogeneous catalyst (Fig. S3). In fact, there is no any peak in the CV curves of  $\text{PMo}_{11}$ ,  $\text{Cr}(\text{acac})_3$ , and GO in the range of 0.1-0.45 V. However, in the CV curve of  $\text{PMo}_{11}\text{-Cr}$ , a hump can be observed at around +0.36 V vs RHE assigned to the oxidation of  $\text{Cr}^{\text{III}}$ . The oxidation process of  $\text{Cr}^{\text{III}}$  is irreversible, with its corresponding reduction wave appearing at 0.19 V vs RHE.<sup>1</sup> Furthermore, the CV analysis of  $\text{PMo}_{11}\text{-Cr-mGO}$  indicates an irreversible cycle too. The observed shift could be attributed to strong interaction of  $\text{PMo}_{11}$  species with  $\text{Cr}(\text{acac})_2$  species which results in decreasing the electron density on the  $\text{PMo}_{11}$  and the stabilization of its energy levels.<sup>2,3</sup> Therefore,  $\text{PMo}_{11}\text{-Cr}$  immobilized on mGO represents enhanced catalytic properties in the HER process.

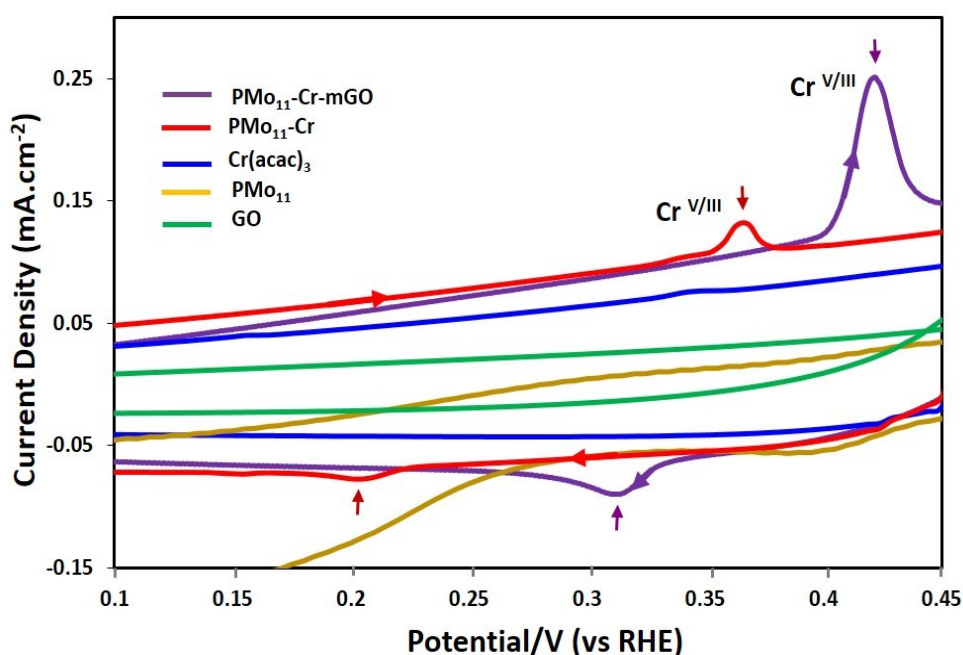

**Fig. S3.** CV curves of  $\text{PMo}_{11}\text{-Cr-mGO}$ ,  $\text{PMo}_{11}\text{-Cr}$ ,  $\text{PMo}_{11}$ ,  $\text{Cr}(\text{acac})_3$ , and GO in 0.5M  $\text{H}_2\text{SO}_4$ . Scan rate of  $10 \text{ mV}\cdot\text{s}^{-1}$ .

## References

- (1) Liu, W.; Al-Oweini, R.; Meadows, K.; Bassil, B. S.; Lin, Z.; Christian, J. H.; Dalal, N. S.; Bossoh, A. M.; Mbomekalle, I. M.; de Oliveira, P. Cr<sup>III</sup>-substituted heteropoly-16-tungstates [Cr<sup>III</sup><sub>2</sub> (B-β-X<sup>IV</sup>W<sub>8</sub>O<sub>31</sub>)<sub>2</sub>]<sub>14</sub> (X= Si, Ge): magnetic, biological, and electrochemical studies. *Inorganic Chemistry* **2016**, 55 (21), 10936-10946.
- (2) Shen, F.-C.; Wang, Y.-R.; Li, S.-L.; Liu, J.; Dong, L.-Z.; Wei, T.; Cui, Y.-C.; Wu, X. L.; Xu, Y.; Lan, Y.-Q. Self-assembly of polyoxometalate/reduced graphene oxide composites induced by ionic liquids as a high-rate cathode for batteries: “killing two birds with one stone”. *Journal of Materials Chemistry A* **2018**, 6 (4), 1743-1750.
- (3) Shahsavarifar, S.; Masteri-Farahani, M.; Ganjali, M. R. Design and application of a polyoxometalate-ionic liquid-graphene oxide hybrid nanomaterial: New electrocatalyst for water oxidation. *Colloids and Surfaces A: Physicochemical and Engineering Aspects* **2022**, 632, 127812.

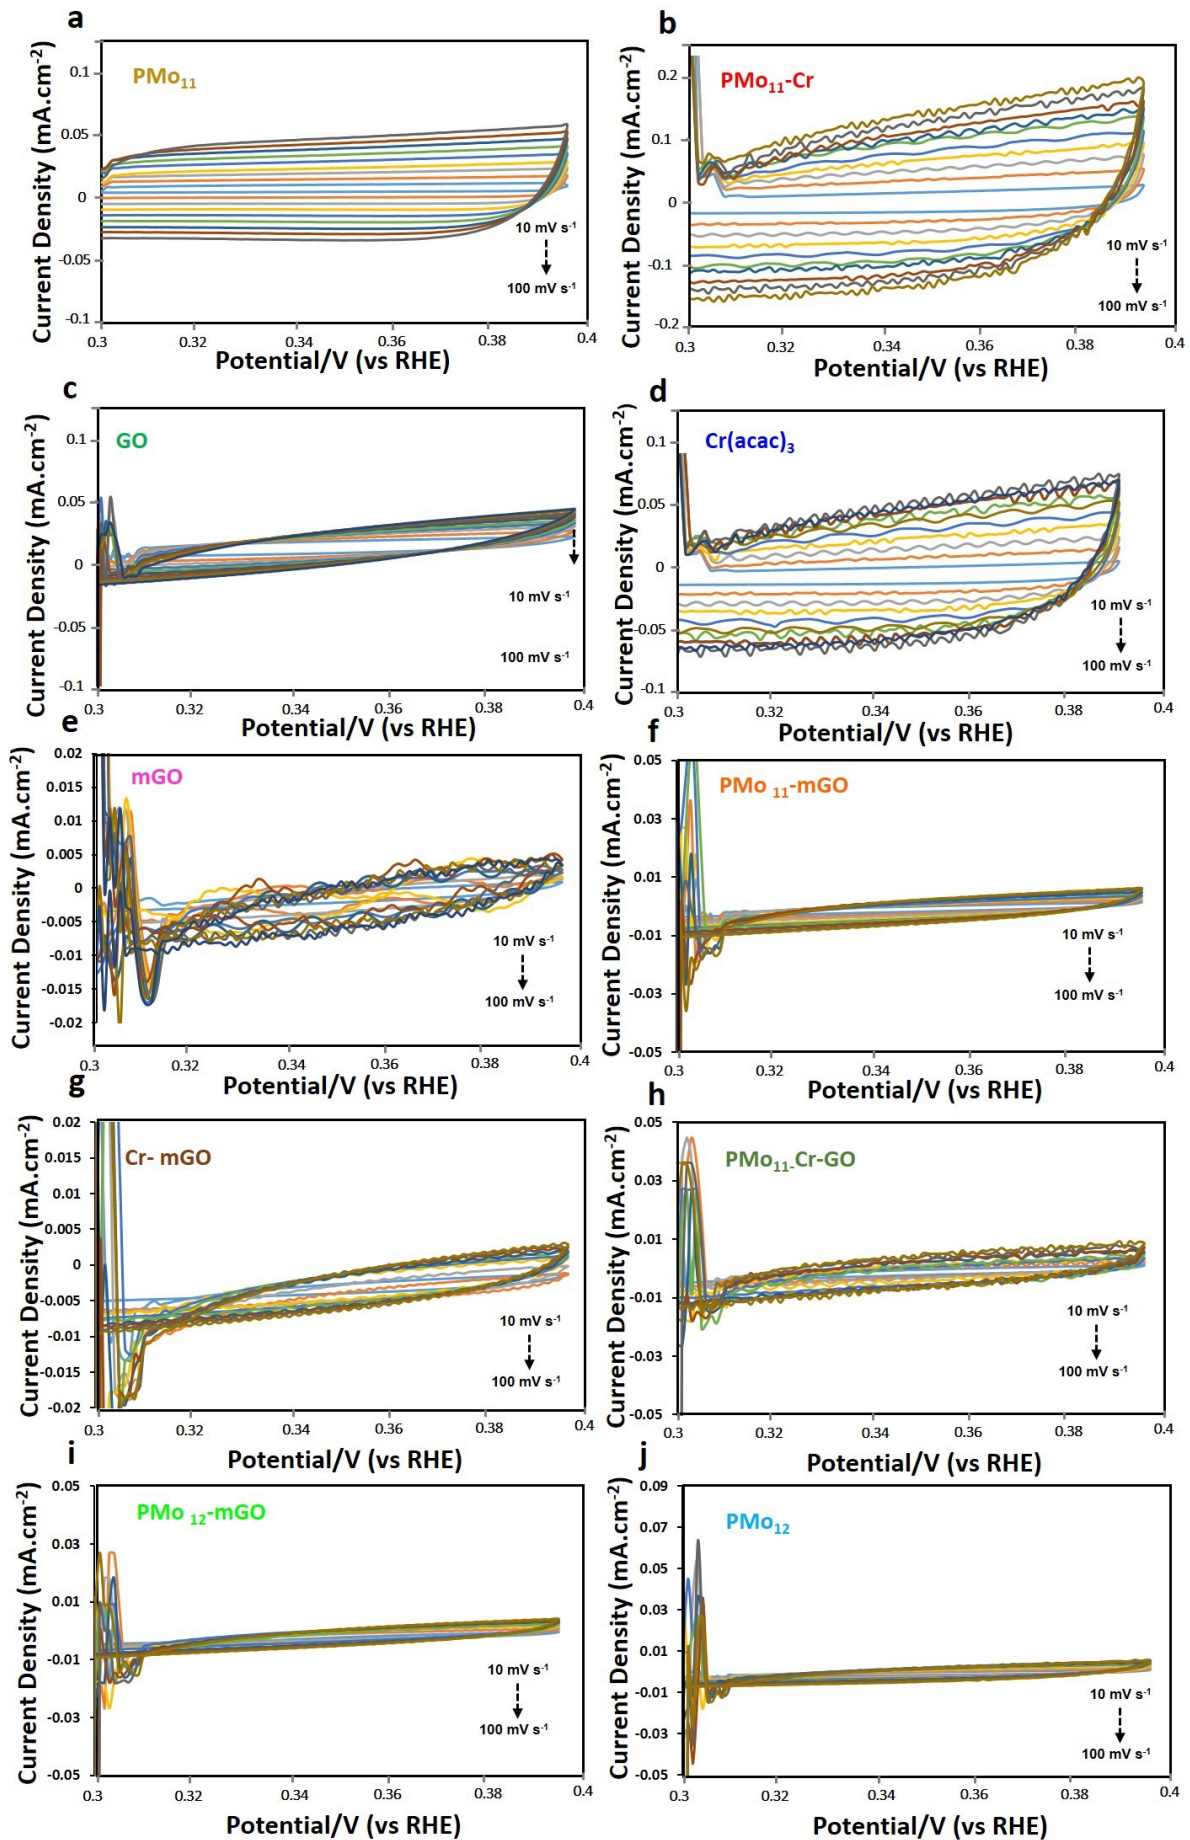



**Fig. S4.** CV curves in the region of 0.3~0.4 V vs. RHE for the (a) P<sub>Mo</sub><sub>11</sub>, (b) P<sub>Mo</sub><sub>11</sub>-Cr, (c) GO, (d) Cr(acac)<sub>3</sub>, (e) mGO, (f) P<sub>Mo</sub><sub>11</sub>-mGO, (g) Cr-mGO, (h) P<sub>Mo</sub><sub>11</sub>-Cr-GO, (i) P<sub>Mo</sub><sub>12</sub>-mGO, and (j) P<sub>Mo</sub><sub>12</sub>.

**Table S2.** The double layer capacitance and ECSA of P<sub>Mo</sub><sub>11</sub>-Cr-mGO, P<sub>Mo</sub><sub>11</sub>-Cr, P<sub>Mo</sub><sub>11</sub>, Cr(acac)<sub>3</sub>, mGO, P<sub>Mo</sub><sub>11</sub>-mGO,

| No. | Sample                                | C <sub>dl</sub> (mF.cm <sup>-2</sup> ) | ECSA (m <sup>2</sup> .g <sup>-1</sup> ) |
|-----|---------------------------------------|----------------------------------------|-----------------------------------------|
| 1   | P <sub>Mo</sub> <sub>11</sub> -Cr-mGO | 32                                     | 46.7                                    |
| 2   | P <sub>Mo</sub> <sub>11</sub> -Cr     | 7                                      | 10.23                                   |
| 3   | Cr(acac) <sub>3</sub>                 | 4                                      | 5.85                                    |
| 4   | P <sub>Mo</sub> <sub>11</sub>         | 2                                      | ~3                                      |
| 5   | GO                                    | 0.5                                    | ~1                                      |
| 6   | mGO                                   | -                                      | -                                       |
| 7   | P <sub>Mo</sub> <sub>11</sub> -mGO    | 0.3                                    | ~0.5                                    |
| 8   | P <sub>Mo</sub> <sub>12</sub> -mGO    | -                                      | -                                       |
| 9   | P <sub>Mo</sub> <sub>11</sub> -Cr-GO  | -                                      | -                                       |
| 10  | P <sub>Mo</sub> <sub>12</sub>         | -                                      | -                                       |
| 11  | Cr-mGO                                | -                                      | -                                       |

P<sub>Mo</sub><sub>12</sub>-mGO, P<sub>Mo</sub><sub>11</sub>-Cr-GO, P<sub>Mo</sub><sub>12</sub>, Cr-mGO, and GO.
